# Supplementary material for: Attention switching through text dissimilarity: a cognition research on fragmented reading behavior
Source: Frontiers journal article supplement (doi:10.3389/fnhum.2024.1402746), 2024-06-25
Supplement: Table_2.XLSX [file Table_2.XLSX]

## Sheet: Sheet1
主题	主题词	文本
美食	金华火腿	从前北方人不懂吃火腿嫌其有一股陈腐的油腻涩味
美食	金华火腿	也许是不善处理把“滴油”一部分未加削裁就吃下去
美食	金华火腿	当然会吃得舌矫不能下
美食	金华火腿	好像舌头要粘住上膛一样
美食	金华火腿	总觉得没有清酱肉爽口
美食	金华火腿	道地的北方餐馆作菜配料永远是清酱肉
美食	金华火腿	事实上清酱肉也的确很好
美食	金华火腿	我每次作江南游总是携带几方清酱肉分馈亲友
美食	金华火腿	只是清酱肉要输金华火腿特有的一段香
美食	金华火腿	它的历史且不去谈它
美食	金华火腿	也许是宋朝大破金兵的宗泽于无意中所发明
美食	金华火腿	宗泽是义乌人在金华之东
美食	金华火腿	所以直到如今凡火腿必曰金华火腿
美食	金华火腿	制作方法亦不必细究总之手续及材料必定很有考究
美食	金华火腿	东阳上蒋村蒋氏一族大部分以制火腿为业
美食	金华火腿	金华本地常不能吃到好的火腿上品均已行销各地
美食	金华火腿	我在上海时每经大马路辄至天福市得熟火腿四角钱
美食	金华火腿	店员以利刃切成薄片瘦肉鲜明似火肥肉依稀透明
美食	金华火腿	佐酒下饭为无上妙品至今思之犹有余香
美食	金华火腿	某日吴梅先生宴请东南大学同事予亦作陪
美食	金华火腿	席间上清蒸金华火腿盛以高边大瓷盘取火腿最精部分
美食	金华火腿	切成半寸见方高寸许之小块二三十块矗立于盘中
美食	金华火腿	纯由醇酿花雕蒸制熟透味之鲜美无与伦比
美食	金华火腿	先生微酡击案高歌盛会难忘于今已有半个世纪有余
美食	金华火腿	抗战时某日张道藩先生召饮于重庆之留春坞
美食	金华火腿	留春坞是云南馆子
美食	金华火腿	云南的食物产品都异常硕大猪腿亦不例外
美食	金华火腿	故云腿通常均较金华火腿为壮观脂多肉厚
美食	金华火腿	虽香味稍逊但是做叉烧火腿则特别出色
美食	金华火腿	留春坞的叉烧火腿大厚片烤熟夹面包丰腴适口
美食	金华火腿	较湖南馆子的蜜汁火腿似乎尤胜一筹
美食	金华火腿	台湾气候太热不适于制作火腿
美食	金华火腿	但有不少人仿制结果不是粗制滥造
美食	金华火腿	便是腌晒不足急于发售带有死尸味
美食	金华火腿	幸而无尸臭亦是一味死成与家乡肉无殊
美食	金华火腿	逢年过节常收到礼物金华火腿是其中一色
美食	金华火腿	即使可以食用其中那根大骨头很难剔除
美食	金华火腿	运斤猛斫可能砍得稀巴烂而骨尚未断
美食	金华火腿	我一见火腿便觉束手无策廉价出售不失为一办法
美食	金华火腿	否则只好持往熟识商店请求代为肢解
美食	金华火腿	有人告诉我整只金华火腿煮熟是有诀窍的
美食	金华火腿	将其浸泡水中三数日每日换水一二次
美食	金华火腿	然后刮磨表面油渍然后用凿子挖出其中的骨头
美食	金华火腿	然后用麻绳紧紧捆绑下锅煮沸二十分钟
美食	金华火腿	然后以微火煮两小时然后再大火煮沸取出冷却即可食用
美食	金华火腿	像这样繁复的手续我们哪得工夫
美食	金华火腿	不如买现成的火腿吃如果买不到干脆不吃
美食	金华火腿	有一次得到一只真的金华火腿瘦小坚硬
美食	金华火腿	持往熟识商肆老板奏刀“砉”的一声劈成两截
美食	金华火腿	他怔住了鼻孔翕张好像是嗅到了异味惊叫：
美食	金华火腿	这是道地的金华火腿数十年不闻此味矣
美食	金华火腿	他要求把爪尖送给他
美食	金华火腿	结果连蹄带爪都送给他了
美食	金华火腿	他说回家去要好好炖一锅汤
美食	金华火腿	美国所谓ham不是不好吃是另一种东西
美食	金华火腿	趁热切大薄片而食之亦颇可口
美食	金华火腿	唯不可与金华火腿同日而语
美食	金华火腿	佛琴尼亚火腿则又是一种货色
美食	金华火腿	色香味均略近似金华火腿
美食	金华火腿	常居海外的游子得此聊胜于无
美食	豆腐	我们中国食品中的瑰宝之一就是豆腐
美食	豆腐	制作之法是否始于汉淮南王刘安没有关系
美食	豆腐	反正我们已经吃了这么多年至今仍然在吃
美食	豆腐	在海外留学的人到唐人街打牙祭总要吃一盘
美食	豆腐	关于豆腐可以编写一部大书
美食	豆腐	现在只是谈谈几项我个人所喜欢的吃法
美食	豆腐	凉拌最简单不过
美食	豆腐	买一块豆腐冲洗干净
美食	豆腐	加上一些葱花撒些盐加麻油就很好吃
美食	豆腐	若是用红酱浇上去更好吃
美食	豆腐	至不济浇上一些酱油膏和麻油也不错
美食	豆腐	我最喜欢的是香椿凉拌豆腐
美食	豆腐	香椿就是庄子所说的
美食	豆腐	以八千岁为春以八千岁为秋的椿
美食	豆腐	取其吉利我家后院植有一棵不大不小的椿树
美食	豆腐	摘下来用沸水一烫切成碎末用来凉拌有奇香
美食	豆腐	春发嫩芽绿中微带红色
美食	豆腐	可是别误摘臭椿臭椿就是樗
美食	豆腐	李时珍曰其叶臭恶欠年人或采食
美食	豆腐	近来台湾也有香椿芽偶然在市上出现
美食	豆腐	虽非臭椿但是嫌其太粗壮香气不足
美食	豆腐	鸡刨豆腐是普通家常菜可是很有风味
美食	豆腐	用铲子在炒锅热油里戳碎戳得乱七八糟
美食	豆腐	略炒一下倒下一个打碎了的鸡蛋再炒加大量葱花
美食	豆腐	锅塌又是另一种味道
美食	豆腐	将其切成许多长方块厚薄随意裹以鸡蛋汁
美食	豆腐	再裹上一层芡粉入油锅炸炸到两面焦取出
美食	豆腐	再下锅浇上预先备好的调味汁
美食	豆腐	如酱油料酒等如有虾子掺入更好
美食	豆腐	略烹片刻即可供食
美食	豆腐	沿街有卖豆腐小吃的摊子
美食	豆腐	担子一边是锅灶将其久煮成蜂窝状
美食	豆腐	另一边是碗匙佐料如酱油韭菜末之类
美食	豆腐	自己在家里也可以做
美食	豆腐	煮得烂加上些佐料如花椒之类也别有风味
美食	豆腐	用头号大盘上面平铺着嫩嫩的豆腐
美食	豆腐	一片片的像瓦垄然整齐端正
美食	豆腐	黄澄澄的稀溜溜的蚝油汁洒在上面亮晶晶的
美食	豆腐	那时候四川菜在上海初露头角
美食	豆腐	我首次品尝诧为异味
美食	豆腐	此后数十年间吃过无数次川菜不曾再遇此一杰作
美食	豆腐	我揣想可能是摆好之后去蒸的然后浇汁
美食	豆腐	厚德福有一道名菜尝过的人不多
美食	豆腐	因为非有特殊关系或情形他们不肯做
美食	豆腐	做起来太麻烦这就是罗汉豆腐
美食	豆腐	捣成泥加芡粉以增其黏性
美食	豆腐	然后捏成小饼状实以肉馅
美食	豆腐	和捏汤团一般下锅过油
美食	豆腐	再下锅红烧辅以佐料
美食	豆腐	罗汉是断尽三界一切见思惑的圣者
美食	豆腐	焉肯吃内含肉馅的丸子
美食	豆腐	而且也没有特殊的美味
美食	豆腐	和佛跳墙同是噱头而已
美食	豆腐	广受欢迎的还有冰冻豆腐
美食	豆腐	可下火锅也可加上粉丝熬白菜
美食	豆腐	有人说玉泉山的最好吃其实也未必
美食	豆腐	凡是冰冻豆腐味道都差不多
美食	豆腐	我常看到北方的劳苦人民辛劳一天
美食	豆腐	然后拿着一大块锅盔弄上一大碗
美食	豆腐	我知道他自食其力他很快乐
美食	羊肚儿	爆双脆是北方山东馆的名菜
美食	羊肚儿	可是此地北方馆没有会做爆双脆的
美食	羊肚儿	如果你不知天高地厚进北方馆就点爆双脆
美食	羊肚儿	而该北方馆竟也不知地厚天高硬敢应这一道菜
美食	羊肚儿	结果一定是端上来一盘黑不溜秋的死眉瞪眼的东西
美食	羊肚儿	一看就不起眼入口也嚼不烂令人败兴
美食	羊肚儿	就是在北平东兴楼或致美斋
美食	羊肚儿	爆双脆也是称量手艺的一道菜
美食	羊肚儿	利巴头二把刀是不敢动的
美食	羊肚儿	所谓双脆是鸡胗和羊肚儿
美食	羊肚儿	两样东西旺火爆炒炒出来红白相间样子漂亮
美食	羊肚儿	咀嚼之际自己都能听到咯吱咯吱地响
美食	羊肚儿	鸡胗易得捡肥大者去里
美食	羊肚儿	所谓去里就是把附在上面的一层厚皮去掉
美食	羊肚儿	我们平常在山东馆子叫清炸胗
美食	羊肚儿	总是附带关照茶房一声要去里儿
美食	羊肚儿	即因去了里儿才能嫩
美食	羊肚儿	一般人不知去里嚼起来要吐核儿不是味道
美食	羊肚儿	肚子是羊肚儿而且是厚肥的肚领
美食	羊肚儿	而且是剥皮的肚仁儿这才够资格成为一脆
美食	羊肚儿	用猪肚儿来代替羊肚儿那就逊色多了
美食	羊肚儿	鸡胗要先用刀划横竖痕越细越好
美食	羊肚儿	目的是使油容易渗透而热力迅速侵入
美食	羊肚儿	因为这道菜纯粹是靠火候
美食	羊肚儿	两样东西不能一起过油炒
美食	羊肚儿	鸡胗需时稍久要先下锅
美食	羊肚儿	若是一起下锅结果不是羊肚儿老了就是鸡胗不够熟
美食	羊肚儿	这两样东西下锅爆炒勾汁来不及用铲子翻动
美食	羊肚儿	必须端起锅来把锅里的东西抛向半空中
美食	羊肚儿	液体固体一起掂起连掂三五下子熟了
美食	羊肚儿	这不是特技表演这是火候必需的功夫
美食	羊肚儿	在旺火熊熊之前热油泼溅之际
美食	羊肚儿	把那本身好几斤重的铁锅
美食	羊肚儿	一只手耍那两下子没有一点手艺行么
美食	羊肚儿	难怪此地山东馆不敢轻易试做爆双脆
美食	羊肚儿	一来材料不齐二来高手难得
美食	羊肚儿	谈到这里想到北平的爆肚儿
美食	羊肚儿	肚儿是羊肚儿口北的绵羊又肥又大
美食	羊肚儿	羊胃有好几部分以肚领儿为最厚实
美食	羊肚儿	馆子里卖的羊肚儿以肚领儿为限
美食	羊肚儿	而且是剥了皮的所以称之为肚仁儿
美食	羊肚儿	有三种烹饪羊肚儿的做法：盐爆油爆汤爆
美食	羊肚儿	盐爆不勾芡粉只加一些芫荽梗葱花清清爽爽
美食	羊肚儿	油爆要勾大量芡粉黏黏糊糊
美食	羊肚儿	汤爆则是清汤汆煮完全本味蘸卤虾油吃
美食	羊肚儿	记得从前在外留学时想吃的家乡菜就是羊肚儿
美食	羊肚儿	后来回到北平东车站一下车时已过午
美食	羊肚儿	料想家中午饭已毕乃把行李寄存车站
美食	羊肚儿	步行到煤市街致美斋独自小酌一口气叫了三个羊肚儿
美食	羊肚儿	盐爆油爆汤爆吃得我牙根清酸
美食	羊肚儿	然后一个清油饼一碗烩两鸡丝
美食	羊肚儿	酒足饭饱大摇大摆还家
美食	羊肚儿	生平快意之餐隔五十余年犹不能忘
美食	羊肚儿	烩银丝也很可口
美食	羊肚儿	煮烂了的肚板儿切成细丝烩出来颜色雪白
美食	羊肚儿	煮前一定要洗得干净才成
美食	羊肚儿	在家里自己煮羊肚儿也并不难
美食	羊肚儿	除去草芽之后用盐巴用力翻来翻去地搓
美食	羊肚儿	就可以搓得雪白而且可以除去膻气
美食	羊肚儿	整个羊胃一律切丝宽汤慢煮煮烂为止
美食	炸丸子	我小时候根本不懂什么五臭八珍
美食	炸丸子	只知道炸丸子最为可口
美食	炸丸子	肉剁得松松细细的炸得外焦里嫩
美食	炸丸子	入口即酥不需大嚼既不吐核又不摘刺
美食	炸丸子	蘸花椒盐来吃一口一个实在是无上美味
美食	炸丸子	可惜一盘炸丸子只有二十来个
美食	炸丸子	桌上人多分下来差不多每人两三个
美食	炸丸子	刚把馋虫诱上喉头就难以为继了
美食	炸丸子	我们住家的胡同口有一个同和馆近在咫尺
美食	炸丸子	有时家里来客留饭就在同和馆叫几个菜作为补充
美食	炸丸子	其中必有炸炸丸子亦所以餍我们几个孩子所望
美食	炸丸子	有一天我们两三个孩子偎在母亲身边闲话
美食	炸丸子	我的小弟不知怎么的心血来潮
美食	炸丸子	没头没脑地冒出这样的一句话：
美食	炸丸子	要多少钱一碟炸丸子
美食	炸丸子	我们听了哄然大笑母亲却觉得一阵心酸
美食	炸丸子	立即派佣人到同和馆买来一碟炸丸子
美食	炸丸子	我们两三个孩子伸手抓食
美食	炸丸子	每人分到十个左右心满意足
美食	炸丸子	事隔七十多年不能忘记那一回吃炸丸子的滋味
美食	炸丸子	丸子大了炸起来就不容易炸透
美食	炸丸子	如果炸透外面一层又怕炸过火所以要小
美食	炸丸子	有些馆子称之为樱桃丸子也不过是形容其小
美食	炸丸子	其实这是夸张事实上总比樱桃大些
美食	炸丸子	要炸得外焦里嫩有一个诀窍
美食	炸丸子	先用温油炸到八分熟捞起丸子使稍冷却
美食	炸丸子	在快要食用的时候投入沸油中再炸一遍
美食	炸丸子	这样便可使外面焦而里面不至变老
美食	炸丸子	为了偶尔变换样子炸丸子做好之后
美食	炸丸子	还可以用葱花酱油芡粉在锅里勾一些卤
美食	炸丸子	加上一些木耳然后把炸丸子放进去
美食	炸丸子	滚一下就起锅是为熘丸子
美食	炸丸子	如果用高汤煮丸子而不用油煎煮得白白嫩嫩的
美食	炸丸子	加上一些黄瓜片或是小白菜心也很可口
美食	炸丸子	湖北馆子的蓑衣丸子也很特别
美食	炸丸子	是用丸子裹上糯米上屉蒸
美食	炸丸子	蒸出来一个个的粘着挺然翘然的米粒
美食	炸丸子	好像是披了一件蓑衣故名
美食	炸丸子	这道菜要做得好并不难
美食	炸丸子	糯米先泡软再蒸就不会生硬
美食	炸丸子	我不知道为什么湖北人特喜糯米
美食	炸丸子	豆皮要包糯米烧卖也要包糯米
美食	炸丸子	我私人以为除了粽子汤团和八宝饭之外
美食	炸丸子	糯米派不上什么用场
美食	炸丸子	北平酱肘子铺卖一种炸丸子
美食	炸丸子	扁扁的外表疙瘩噜苏
美食	炸丸子	里面全是一些筋头麻脑的剔骨肉价钱便宜
美食	炸丸子	可是风味特殊当做火锅的锅料用最为合适
美食	炸丸子	我小时候上学如果手头富余
美食	炸丸子	买个炸丸子夹在烧饼里惬意极了
美食	炸丸子	如今回想起来还回味无穷
美食	炸丸子	最后还不能不提到“乌丸子”
美食	炸丸子	一半炸猪肉丸子
美食	炸丸子	一半炸鸡胸肉丸子
美食	炸丸子	盛在一个盘子里半黑半白很是别致
美食	炸丸子	要有一小碗卤汁蘸卤汁吃才有风味
美食	炸丸子	为什么叫乌丸子我不知道
美食	炸丸子	大概是什么一位姓乌的大老爷所发明故以此名之
美食	炸丸子	从前有那样的风气人以菜名菜以人名
美食	炸丸子	如潘鱼江豆腐之类皆是
